# Supplementary material for: Epigenome-wide DNA methylation study of whole blood in patients with sporadic amyotrophic lateral sclerosis
Source: PubMed Central journal article supplement — Chin Med J (Engl). 2022 Jul 19;135(12):1466–73. doi: 10.1097/CM9.0000000000002090 (PMC9481424; doi:10.1097/cm9.0000000000002090), 2022-07-19
Supplement: cm9-135-1466-s005.pdf [file cm9-135-1466-s005.pdf]

| Rank | Name           | Score | Type             |
|------|----------------|-------|------------------|
| 1    | <i>SOD1</i>    | 19    | Known ALS gene   |
| 1    | <i>OPTN</i>    | 19    | Known ALS gene   |
| 1    | <i>C9orf72</i> | 19    | Known ALS gene   |
| 4    | <i>FUS</i>     | 18    | Known ALS gene   |
| 4    | <i>ATXN2</i>   | 18    | Known ALS gene   |
| 6    | <i>TARDBP</i>  | 17    | Known ALS gene   |
| 6    | <i>VCP</i>     | 17    | Known ALS gene   |
| 6    | <i>UBQLN2</i>  | 17    | Known ALS gene   |
| 9    | <i>MATR3</i>   | 16    | Known ALS gene   |
| 10   | <i>DCTN1</i>   | 15    | Known ALS gene   |
| 11   | <i>CHCHD10</i> | 14    | Known ALS gene   |
| 11   | <i>SQSTM1</i>  | 14    | Known ALS gene   |
| 13   | <i>VAPB</i>    | 12    | Known ALS gene   |
| 14   | <i>ANG</i>     | 11    | Known ALS gene   |
| 14   | <i>PFN1</i>    | 11    | Known ALS gene   |
| 14   | <i>TBK1</i>    | 11    | Known ALS gene   |
| 14   | <i>HNRNPA1</i> | 11    | Known ALS gene   |
| 18   | <i>TUBA4A</i>  | 8     | Known ALS gene   |
| 18   | <i>TNF</i>     | 8     | DMR related gene |
| 20   | <i>UNC13A</i>  | 5     | Known ALS gene   |
| 21   | <i>TAF15</i>   | 4     | Known ALS gene   |
| 22   | <i>NEK1</i>    | 3     | Known ALS gene   |
| 23   | <i>CSNK1E</i>  | 2     | DMR related gene |
| 23   | <i>DNAH9</i>   | 2     | DMP related gene |
| 23   | <i>DDO</i>     | 2     | DMP related gene |
| 23   | <i>C21orf2</i> | 2     | Known ALS gene   |
| 27   | <i>ABCB1</i>   | 1     | DMP related gene |
| 27   | <i>LGALS1</i>  | 1     | DMR related gene |
| 27   | <i>LRRC23</i>  | 1     | DMR related gene |
| 27   | <i>NRP1</i>    | 1     | DMP related gene |
| 27   | <i>DAO</i>     | 1     | Known ALS gene   |
| 27   | <i>ATAD3B</i>  | 1     | DMP related gene |
| 27   | <i>SCFD1</i>   | 1     | Known ALS gene   |
| 27   | <i>NWD1</i>    | 1     | DMR related gene |
| 27   | <i>ENO2</i>    | 1     | DMR related gene |
